# Supplementary material for: Rationale and feasibility of a combined rapid assessment of avoidable blindness and hearing loss protocol
Source: PLoS One. 2020 Feb 13;15(2):e0229008. doi: 10.1371/journal.pone.0229008 (PMC7018009; doi:10.1371/journal.pone.0229008)
Supplement: S4 File — (XLSX) [file pone.0229008.s004.xlsx]

## Sheet: General Info 
CAMEROON DISABILITY STUDY - Screening and Examination Questionnaire
1.	Interviewer No:																			2.	Date (Day/Month/Year):								__ __ / __ __ / __ __
	INTERVIEWER_NUMBER																				DATE
3.	Cluster No:																			4.	House No:
	CLUSTER_NO																				HOUSE_NO
5.	Subject Name:																			6.	Subject ID No:
	SUBJ_NAME																				ID_NO
7.	Gender				Male:		O	(1)																			8. Age (years):					AGE_Y
	SEX				Female:		O	(2)																			9. Age (in months if <1 year):					AGE_M
10.	Screening Completion Matrix
							10.1 Screen Completed? Yes = 1 Unable to Complete = 2 Refused = 3					10.2 Screen Case = 1 Not Screen Case = 0					10.3 If screen positive, exam Completed? Yes = 1 Unable to Complete = 2 Refused = 3					10.4 If unable to complete screen or exam please give reason												10.5 Referral Needed Yes = 1 No = 0
A. WG Disability							SCREEN_COMPLETE_A1					SCREEN_COMPLETE_A2					N/A					SCREEN_COMPLETE_A4												N/A
B. PHQ9							SCREEN_COMPLETE_B1					SCREEN_COMPLETE_B2					N/A					SCREEN_COMPLETE_B4												SCREEN_COMPLETE_B5
C. MSI Impairment							SCREEN_COMPLETE_C1					SCREEN_COMPLETE_C2					SCREEN_COMPLETE_C3					SCREEN_COMPLETE_C4												SCREEN_COMPLETE_C5
D. Visual Impairment							SCREEN_COMPLETE_D1					SCREEN_COMPLETE_D2					SCREEN_COMPLETE_D3					SCREEN_COMPLETE_D4												SCREEN_COMPLETE_D5
E. Hearing Impairment (OAE)							SCREEN_COMPLETE_E1					SCREEN_COMPLETE_E2					N/A					SCREEN_COMPLETE_E4												N/A
F. Hearing Imp (PTA) if OAE +ve							SCREEN_COMPLETE_F1					SCREEN_COMPLETE_F2					SCREEN_COMPLETE_F3					SCREEN_COMPLETE_F4												SCREEN_COMPLETE_F5
G. Hearing Exam (if OAE and PTA screen positive)							SCREEN_COMPLETE_G1					SCREEN_COMPLETE_G2					SCREEN_COMPLETE_G3					SCREEN_COMPLETE_G4												SCREEN_COMPLETE_G5
TO BE FILLED IN BY FIELD TEAM MEMBER RESPONSIBLE FOR CHECKING QUESTIONNAIRES FOR COMPLETION																											CONFIRMED
REMARKS:					______________________________________________________			REMARK																			Case						O	(1)
					_________________________________________																						Control						O	(2)
																						Interviewer #			INT_NO		Not eligible for Case/Control						O (3)
																												CONFIRMED_CC
								TO BE FILLED IN BY DATA ENTRY CLERK
														Entry 1								Entry 2
								INITIALS:
								DATE OF ENTRY:
								REMARKS:																										1

## Sheet: WG <17
	Cluster no:										Household no:																Subject ID no:						Interviewer ID No.
	A. Washington Group Questions for all participants AGED 2 to 17
	I am now going to ask you some questions about certain everyday activities, and whether you have any difficulties in doing them. Please tell me if you do not understand question, and I will repeat it
	Note to Interviewer: If respondent is aged 8-17 and being interviewed directly, replace "does [name]" with "do you" in questions. Read all response options in full for each question asked
	Children aged 2-17 years
	1a) Does [name] wear glasses or contact lenses																			Yes		O	(1)				No		O	(0)
																											No difficulty				Some difficulty				A lot of difficulty				Cannot do at all				Dont Know
		[if child wears glasses]																									O (1)				O (2)				O (3)				O (4)				O (5)
	1b) Does [name] have difficulty seeing, when wearing his/her glassses?
		[if child does NOT wear glasses]																									O (1)				O (2)				O (3)				O (4)				O (5)
	1c) Does [name] have difficulty seeing?
	Children aged 2-17 years
	2a) Does [name] use a hearing aid?																			Yes		O	(1)				No		O	(0)
																											No difficulty				Some difficulty				A lot of difficulty				Cannot do at all				Dont Know
		[if child uses a hearing aid]																									O (1)				O (2)				O (3)				O (4)				O (5)
	2b) Does [name] have difficulty hearing, when using his/her hearing aid(s)?
		[if child does NOT use a hearing aid]																									O (1)				O (2)				O (3)				O (4)				O (5)
	2c) Does [name] have difficulty hearing?
																											No difficulty				Some difficulty				A lot of difficulty				Cannot do at all				Dont Know
	Children aged 2-17 years																										O (1)				O (2)				O (3)				O (4)				O (5)
	3) Compared with children of the same age, does [name] have difficulty walking
	Children aged 5- 17 years																										O (1)				O (2)				O (3)				O (4)				O (5)
	4) Compared with children of the same age, does [name] have difficulty with self-care such as feeding or dressing him/herself?
	Children aged 2 -4 years																										O (1)				O (2)				O (3)				O (4)				O (5)
	5a) Does [name] have difficulty understanding you?
	6a) Do you have difficulty understanding what your child wants?																										O (1)				O (2)				O (3)				O (4)				O (5)
	Children aged 5-17 years																										O (1)				O (2)				O (3)				O (4)				O (5)
	5b) Compared with children of the same age and using [his/her] usual language, does [name] have difficulty understanding other people?
	6b)Compared with children of the same age and using [his/her] usual language, does [name] have difficulty being understood by other people?																										O (1)				O (2)				O (3)				O (4)				O (5)
	Children aged 2-3 years																										O (1)				O (2)				O (3)				O (4)				O (5)
	7a) Compared with children of the same age, does [name] have difficulty learning the names of common objects?
	Children aged 3-17 years																										O (1)				O (2)				O (3)				O (4)				O (5)
	7b) Compared with children of the same age, does [name] have difficulty learning to do new things?
	Children aged 5-17 years																										O (1)				O (2)				O (3)				O (4)				O (5)
	8) Compared with children of the same age, does [name] have difficulty remembering things that they have learned?
																							2
		Cluster no:									Household no:																		Subject ID no:						Interviewer ID No.
																															The same or Less				More				A lot more				Dont Know
	Children aged 5-17 years																														O (1)				O (2)				O (3)				O (4)
	9) Compared with children of the same age, how much does [he /she] worry or feel sad?
	Children aged 2-4 years																														O (1)				O (2)				O (3)				O (4)
	10a) Compared with children of the same age, how much does [name] kick, bite or hit other children or adults?
																											No difficulty				Some difficulty				A lot of difficulty				Cannot do at all				Dont Know
	Children aged 5-17 years																										O (1)				O (2)				O (3)				O (4)				O (5)
	10b) Compared with children of the same age, how much difficulty does [name] have controlling [his/her] behaviour?
	11) Compared with children of the same age, does [name] have difficulty completing a task?																										O (1)				O (2)				O (3)				O (4)				O (5)
	12) Compared with children of the same age, does [name] have difficulty accepting change to plans or routine?																										O (1)				O (2)				O (3)				O (4)				O (5)
	13) Does [name] have difficulty getting along with children of [his/her] age?																										O (1)				O (2)				O (3)				O (4)				O (5)
	Children aged 2-5 years																										O (1)				O (2)				O (3)				O (4)				O (5)
	14 a1) Compared with children of the same age, does [name] have difficulty playing with toys or household objects?
	Children aged 2-12 years																										O (1)				O (2)				O (3)				O (4)				O (5)
	14a2) Compared with children of the same age, does [name] have difficulty playing with other children?
	Children aged 13-17 years																										O (1)				O (2)				O (3)				O (4)				O (5)
	14b) Compared with children of the same age, does [name] have difficulty doing things with other children? (Include things that children usually do together.)
		Child SCREENS POSITIVE IF:
		ANY QUESTION 1 to 8 SCORES "A lot More", "A lot of Difficulty" or "Cannot do at all"
											Screen case:	O	(1)				COMPLETE FRONT PAGE BEFORE STARTING NEXT SECTION
											Not Screen case:	O	(0)
			To Parent: Based on your/ your child's responses, it seems that your child may experience difficulties in doing certain things compared to other children his/her age, and we would like to ask some more questions about this.
																						3

## Sheet: WG > 17
Cluster no:										Household no:																		Subject ID no:								Interviewer ID No.
A. Washington Group Questions for all participants 18+
I am now going to ask you some questions about certain everyday activities, and whether you have any difficulties in doing them. Please tell me if you do not understand question, and I will repeat it
Note to Interviewer: Read all response options in full for each question asked
1a) Do you wear glasses or contact lenses																			Yes		O	(1)				No		O	(0)
																										No difficulty				Some difficulty				A lot of difficulty				Cannot do at all				Dont Know
	[if respondent wears glasses/contact lenses]																									O (1)				O (2)				O (3)				O (4)				O (5)
1b) Do you have difficulty seeing, even when wearing your glassses/contact lenses?
	[if respondent does NOT wear glasses/contact lenses]																									O (1)				O (2)				O (3)				O (4)				O (5)
1c) Do you have difficulty seeing?
2a) Do you use a hearing aid?																			Yes		O	(1)				No		O	(0)
																										No difficulty				Some difficulty				A lot of difficulty				Cannot do at all				Dont Know
	[if respondent uses a hearing aid]																									O (1)				O (2)				O (3)				O (4)				O (5)
2b) Do you have difficulty hearing, even when using your hearing aid(s)?
	[if respondent does NOT use a hearing aid]																									O (1)				O (2)				O (3)				O (4)				O (5)
2c) Do you have difficulty hearing?
3a) Do you use any equipment or receive help for getting around?																									Yes		O	(1)				No		O	(0)
																										No difficulty				Some difficulty				A lot of difficulty				Cannot do at all				Dont Know
	[if respondent uses equipment or receives help to get around]																									O (1)				O (2)				O (3)				O (4)				O (5)
3b) Do you have difficulty walking or climbing steps, even when using your equipment or with help?
	[if respondent does NOT use equipment or receive help to get around]																									O (1)				O (2)				O (3)				O (4)				O (5)
3c) Do you have difficulty walking or climbing steps?
4a) Do you use sign language?																	Yes		O	(1)				No	O (0)
																										No difficulty				Some difficulty				A lot of difficulty				Cannot do at all				Dont Know
4b) Using your usual language, do you have difficulty communicating, for example understanding or being understood?																										O (1)				O (2)				O (3)				O (4)				O (5)
																										No difficulty				Some difficulty				A lot of difficulty				Cannot do at all				Dont Know
5) Do you have difficulty remembering or concentrating?																										O (1)				O (2)				O (3)				O (4)				O (5)
6) Do you have difficulty with self care, such as washing all over or dressing?																										O (1)				O (2)				O (3)				O (4)				O (5)
7) Do you have difficulty raising a 2 litre bottle of water or soda from waist to eye level?																										O (1)				O (2)				O (3)				O (4)				O (5)
8) Do you have difficulty using your hands and fingers, such as picking up small objects, for example a button or pencil, or opening or closing containers or bottles																										O (1)				O (2)				O (3)				O (4)				O (5)
																							Daily			Weekly				Monthly				A few times a year				Never				Dont Know
9a) How often do you feel worried, nervous or anxious?																							O (1)			O (2)				O (3)				O (4)				O (5)				O (6)
								If NEVER or DONT KNOW to 9a) Go to Q10
																								4
	Cluster no:										Household no:																	Subject ID no:								Interviewer ID No.
9b) Do you take medication for these feelings?																				Yes		O	(1)			No		O	(0)
																							A little			A lot				Somewhere between a little and a lot								Dont Know
9c) Thinking about the last time you felt worried, nervous or anxious, how would you describe the level of these feelings?																							O (1)			O (2)				O (3)								O (4)
																							Daily			Weekly				Monthly				A few times a year				Never				Dont Know
10 a) How often do you feel depressed? Would you say																							O (1)			O (2)				O (3)				O (4)				O (5)				O (6)
								If NEVER or DONT KNOW to 10a) Go to Q 11
10b) Do you take medication for depression?																					Yes		O	(1)			No		O	(0)
																							A little			A lot				Somewhere between a little and a lot								Dont Know
10c) Thinking about the last time you felt depressed, how depressed did you feel?																							O (1)			O (2)				O (3)								O (4)
																							Never			Some Days				Most Days				Every Day				Dont Know
11a) In the past three months, how often did you have pain?																							O (1)			O (2)				O (3)				O (4)				O (5)				If NEVER or DONT KNOW to 11a) go to Q12
																							A little			A lot				Somewhere between a little and a lot								Dont Know
11b) Thinking about the last time you felt pain, how much pain did you have?																							O (1)			O (2)				O (3)								O (4)
																							Never			Some Days				Most Days				Every Day				Dont Know
																																										If NEVER to 12a)
12a) In the past three months, how often did you feel very tired or exhausted?																							O (1)			O (2)				O (3)				O (4)				O (5)				go to END OF SECTION
																							Some of the day			Most of the day				All of the day				Dont Know
12b) Thinking about the last time you felt very tired or exhausted, how long did it last?																							O (1)			O (2)				O (3)				O (4)
																							A little			A lot				Somewhere between a little and a lot								Dont Know
12c) Thinking about the last time you felt this way, how would you describe the level of tiredness?																							O (1)			O (2)				O (3)								O (4)
	Participant SCREENS POSITIVE If:Any Question 1 to 8 scores "A lot", "A lot of Difficulty" or "Cannot do at all"
										Screen case:	O	(1)				To Participant: Based on your responses, it seems that you may experience difficulties in doing certain things compared to other people, and we would like to ask some more questions about this.
										Not Screen case:	O	(0)
	COMPLETE FRONT PAGE BEFORE STARTING NEXT SECTION
																								5

## Sheet: PHQ-9 
Cluster no:							Household no:																Subject ID no:					Interviewer ID No.
B. PHQ-9 Questions for all participants >17
I am now going to ask you a few questions about how you have been feeling recently. Please tell me if you do not understand a question, and I will repeat it
Over the last two weeks, how often have you been bothered by any of the following problems?
																				Not at all				Several Days				More than Half the Days				Nearly Every Day
1. Little interest or pleasure in doing things																				O (0)				O (1)				O (2)				O (3)
2. Feeling down, depressed, or hopeless																				O (0)				O (1)				O (2)				O (3)
3. Feeling tired or having little energy																				O (0)				O (1)				O (2)				O (3)
		If no responses in SHADED AREA go to NEXT SECTION
4. Trouble falling/staying asleep, sleeping too much																				O (0)				O (1)				O (2)				O (3)
5. Poor appetite or overeating																				O (0)				O (1)				O (2)				O (3)
6. Feeling bad about yourself – or that you are a failure or have let yourself or your family down																				O (0)				O (1)				O (2)				O (3)
7.Trouble concentrating on things, such as reading the newspaper or watching television																				O (0)				O (1)				O (2)				O (3)
8. Moving or speaking so slowly that other people could have noticed. Or the opposite – being so fidgety or restless that you have been moving around a lot more than usual																				O (0)				O (1)				O (2)				O (3)
9.Thoughts that you would be better off dead or of hurting yourself in some way																				O (0)				O (1)				O (2)				O (3)
																		Column Totals:									+				+
											Total Score (Add Totals together):
	Participant SCREENS POSITIVE if: Total score greater than 19 and includes at least one answer in the shaded area
																													Screen case:	O	(1)
																													Not Screen case:	O	(0)
																				COMPLETE FRONT PAGE BEFORE STARTING NEXT SECTION
																			6

## Sheet: MSI Exam Page 1
C. RAPID ASSESSMENT OF MUSCULOSKELETAL IMPAIRMENT
A. GENERAL INFORMATION
	Cluster no:							Household no:												Subject ID no:						Examiner Code No.
						Examination status:								Examined:	O	(1)
														Unable to examine:	O	(2)		Reason:
														Refused:	O	(3)
B. SCREEN FOR MUSCULOSKELETAL IMPAIRMENT
I am going to ask you now a few questions about your physical health and abilities.
			1. Who is responding?
									Screen by eligible person:	O	(1)
									Screen by proxy:	O	(0)
2. Use this prefix for 5 and under (by proxy): Compared to other children
																Yes		No										3. Duration
1. Is any part of your body missing or misshapen?:																O (1)		O (0)												Yes		No
2. Do you have any difficulty using your arms?:																O (1)		O (0)				1. Has it lasted>1m?								O (1)		O (0)
3. Do you have any difficulty using your legs?:																O (1)		O (0)				2. Is it permanent?								O (1)		O (0)
4. Do you have any difficulty using any other part of your body?:																O (1)		O (0)
5. Do you need a mobility aid or prosthesis?:																O (1)		O (0)				Examine Participant if: Answer to at least one Q 1-6 is Yes and Answer to at least one "Duration" question is Yes
6. Do you have convulsions, involuntary movement, rigidity or loss of consciousness?:																O (1)		O (0)
																										MSI Exam Needed		Yes	O (1)
																												No	O (0)
C. OBSERVATION OF ACTIVITIES																				E. DURATION AND CONSANGUINITY
															Yes		No			1	Age at impairment:											Since birth:	O	(1)
I. Position						RAM_CI1								Squat/sit bending knees:	O (1)		O (0)															after birth-1 year:	O	(2)
					RAM_CI2									Stand up straight on natural legs:	O (1)		O (0)															1-5 years	O	(3)
	RAM_CI3													Hold arms straight above head, fingers straight:	O (1)		O (0)															6-15 years:	O	(4)
																																16-39 years:	O	(5)
II. Mobility					RAM_CII1									Walk along the 11 metre rope:	O (1)		O (0)															>40 years:	O	(6)
						RAM_CII2								Do it in less than 10 secs:	O (1)		O (0)															Not applicable (No impairment:)	O	(7)
							RAM_CII3							Do it without limping:	O (1)		O (0)
																											No		Yes
III. Right hand function								RAM_CIII1						Touch Nose:	O (1)		O (0)			2				Consanguinity:			O	(0)	O	(1)
						RAM_CIII2								Pick up coin and put in cup:	O (1)		O (0)			F. AETIOLOGY						Tick one only for each impairment
							RAM_CIII3							Tip coin into bowl:	O (1)		O (0)														Impairment no:	1	2
																															Family history:	O	O	(1)
IV. Left hand function								RAM_CIV1						Touch Nose:	O (1)		O (0)														Congenital but no family history:	O	O	(2)
						RAM_CIV2								Pick up coin and put in cup:	O (1)		O (0)														Perinatal hypoxia:	O	O	(3)
							RAM_CIV3							Tip coin into bowl:	O (1)		O (0)														RTA:	O	O	(4)
D. SEIZURE HISTORY																															Civil violence:	O	O	(5)
1	Have you ever had a seizure?																				Trauma										Domestic violence:	O	O	(6)
									No history of seizure:	O	(0)																				Deliberate self harm:	O	O	(7)
									History of seizure:	O	(1)																				Other inc accidents:	O	O	(8)
2	Have you had three or more seizures in the past year?																																	Specify……………………………….
		3 or more seizures							No	O	(0)
									Yes	O	(1)																				Developmental / Nutritional:	O	O	(9)
									Not applicable (never had seizure):	O	(3)																				Infection:	O	O	(10)
3							Number of episodes in last year:																								Neoplasm:	O	O	(11)
									0:	O	(1)																				Iatrogenic:	O	O	(12)
									1-2:	O	(2)																				Traditional	O	O	(13)
									3-10:	O	(3)																				Unknown:	O	O	(14)
									>10:	O	(4)																				Other:	O	O	(15)
									Not applicable (never had seizure):	O	(5)																							Specify……………………………….
																															Not applicable (No impairment:)	O	O	(16)
4									Type of seizure (tick one only)
									Absences:	O	(1)
									Convulsions:	O	(2)
									Not applicable (never had seizure):	O	(3)
																7
G. STRUCTURE AND FUNCTION
Region					Structure		Laterality Left = 1 Right = 2 Both = 3			Nature of change (see codes below)				Magnitude (see codes below)					Region					Structure		Laterality Left = 1 Right = 2 Both = 3			Nature of change (see codes below)				Magnitude (see codes below)
					affected																			affected
					Yes	No																		Yes	No
1. Head and Neck					O (1)	O (0)	RAM_G1_L			RAM_G1_NC				RAM_G1_M					13. Knee Joint					O (1)	O (0)	RAM_G13_L			RAM_G13_NC				RAM_G13_M
2. Shoulder region					O (1)	O (0)	RAM_G2_L			RAM_G2_NC				RAM_G2_M					14. Lower leg					O (1)	O (0)	RAM_G14_L			RAM_G14_NC				RAM_G14_M
3. Upper arm					O (1)	O (0)	RAM_G3_L			RAM_G3_NC				RAM_G3_M					15. Ankle Joint					O (1)	O (0)	RAM_G15_L			RAM_G15_NC				RAM_G15_M
4. Elbow Joint					O (1)	O (0)	RAM_G4_L			RAM_G4_NC				RAM_G4_M					16. Foot					O (1)	O (0)	RAM_G16_L			RAM_G16_NC				RAM_G16_M
5. Forearm					O (1)	O (0)	RAM_G5_L			RAM_G5_NC				RAM_G5_M					17. Foot/Toe Joints					O (1)	O (0)	RAM_G17_L			RAM_G17_NC				RAM_G17_M
6. Wrist Joint					O (1)	O (0)	RAM_G6_L			RAM_G6_NC				RAM_G6_M					18. Whole Leg					O (1)	O (0)	RAM_G18_L			RAM_G18_NC				RAM_G18_M
7. Hand					O (1)	O (0)	RAM_G7_L			RAM_G7_NC				RAM_G7_M					19. Trunk					O (1)	O (0)	RAM_G19_L			RAM_G19_NC				RAM_G19_M
8. Hand/Finger Joints					O (1)	O (0)	RAM_G8_L			RAM_G8_NC				RAM_G8_M					20. C-spine					O (1)	O (0)	RAM_G20_L			RAM_G20_NC				RAM_G20_M
9. Whole arm					O (1)	O (0)	RAM_G9_L			RAM_G9_NC				RAM_G9_M					21. T-spine					O (1)	O (0)	RAM_G21_L			RAM_G21_NC				RAM_G21_M
10. Pelvis					O (1)	O (0)	RAM_G10_L			RAM_G10_NC				RAM_G10_M					22. L-spine					O (1)	O (0)	RAM_G22_L			RAM_G22_NC				RAM_G22_M
11. Hip joint					O (1)	O (0)	RAM_G11_L			RAM_G11_NC				RAM_G11_M					23. Whole body					O (1)	O (0)				RAM_G123_NC				RAM_G23_M
12. Thigh					O (1)	O (0)	RAM_G12_L			RAM_G12_NC				RAM_G12_M
		Nature of Change Codes: No change in structure = 0; Total absence = 1; Partial absence = 2; Additional Part = 3; Aberrant dimensions = 4; Discontinuity = 5; Deviating Position = 6; Qualitative changes = 7; Not Specified = 8; Not applicable = 9
		Magnitude of Function: No impairment = 0; Mild Impairment = 1; Moderate Impairment = 2; Severe Impairment = 3; Complete Impairment = 4
																8

## Sheet: MSI Exam Page 2
Cluster no:										Household no:																Subject ID no:								Examiner Code No.
G. DIAGNOSTIC CASE										H. CASE SEVERITY
CONFIRMATION										Case severity:			Mild			O	(1)
		Case:			O	(1)							Moderate:			O	(2)
		Not case:			O	(0)							Severe:			O	(3)
	I. DIAGNOSIS DECISION ALGORITHM																																		Is it neurological in cause or nature?									J. CASE DIAGNOSIS
	Is it congenital?							No		Is it due to an infection?									No					Is it due to trauma?							No
			Yes												Yes												Yes								No					Yes				Diagnosis 1 _________________					____________________
	a. CONGENITAL/GENETIC														b. INFECTIVE
	UPPER LIMB														O	(01)	Joint Infection											e. ACQUIRED NON TRAUMATIC																Diagnosis 2 _________________
	O	(01)	Polydactyly												O	(02)	Bone infection limb											O	(01)	Degenerative joint disease
	O	(02)	Syndactyly												O	(03)	Bone infection spine											O	(02)	Non infective non traumatic joint disease
	O	(03)	Other congenital hand deformity												O	(03)	Skin/soft tissue infection/wound																											K. TREATMENT INFORMATION
	O	(04)	Other congenital absence of all or part of upper limb																									O	(03)	Bow legs
																												O	(04)	Knock knees
	O	(05)	Other congenital abnormality of upper limb												c. ACQUIRED TRAUMA													O	(05)	Other joint deformity
															O	(01)	Burn contracture
	LOWER LIMB																											O	(11)	Bone tumour (benign or malignant)
	O	(10)	Developmental dysplasia of hip												O	(10)	Fracture non unioin
	O	(11)	Proximal focal femoral deficiency												O	(11)	Fracture malunion											O	(21)	Skin/Soft tissue tumour
	O	(12)	Congenital absence of all or part of tibia												O	(12)	Spinal injury
	O	(13)	Congenital absence of all or part of fibula												O	(13)	Head injury											O	(40)	Spinal deformity-kyphosis
	O	(14)	Other congenital absence of all or part of lower limb																									O	(41)	Spinal deformity-lordosis
															O	(20)	Recurrent/chronic dislocation											O	(42)	Spinal deformity-scoliosis
	O	(15)	Club foot												O	(21)	Post traumatic joint stiffness											O	(43)	Spinal pain limiting function
	O	(16)	Other congenital abnormality of lower limb																									O	(44)	TB spine/spine infection
															O	(30)	Tendon problem
	UPPER AND LOWER LIMB														O	(31)	Muscle problem											O	(50)	Limb pain limiting function
	O	(20)	Amniotic bands												O	(32)	Peripheral nerve problem
	O	(21)	Arthrogryphosis												O	(40)	Amputation											O	(60)	Lymphoedema
															O	(50)	Other Trauma											O	(70)	Other acquired non traumatic
	SPINE
	O	(30)	Congenital deformity of cervical spine																																									L. WHY I HAVE NOT HAD (FURTHER)
	O	(31)	Congenital deformity of thoracolumbar spine												d. NEUROLOGICAL																														TREATMENT
															O	(01)	Epilepsy
	HEAD AND NECK														O	(02)	Leprosy
	O	(40)	Cleft lip												O	(03)	Developmental delay											f. NO DIAGNOSIS
	O	(41)	Cleft lip and palate												O	(04)	Cerebral palsy - spastic											O	(01)	No Diagnosis
	O	(42)	Other congenital deformity of head or face												O	(05)	Cerebral palsy - other
															O	(06)	Paraplegia
	GENERAL														O	(07)	Hemiplegia
	O	(50)	Multiple congenital abnormalities												O	(08)	Quadriplegia
	O	(51)	Sickle cell disease												O	(09)	Facial weakness
	O	(52)	Osteogenesis imperfecta												O	(10)	Peripheral nerve palsy
	O	(53)	Haemophilia												O	(11)	Polio
	O	(54)	Muscular Dystrophy												O	(12)	Other neurological
																										9

## Sheet: Vision
	Cluster no:								Household no:												Subject ID no:						Examiner Code No.
	D. VISUAL IMPAIRMENT
	A. GENERAL INFORMATION
								Examination status:							Examined:	O	(1)
															Unable to examine:	O	(2)		Reason:											Screen Case:	O	(1)
															Refused:	O	(3)													Not Screen case:	O	(0)
	Always ask: "Did you ever have any problems with your eyes?"
	B. VISION SCREEN																C. LENS EXAMINATION											Right eye				Left eye
								Using distance glasses:	Yes	O	(1)		No	O	(0)		Normal lens / minimal lens opacity:												O	(1)			O	(1)
								Using reading glasses:	Yes	O	(1)		No	O	(0)		Obvious lens opacity:												O	(2)			O	(2)
																	Lens absent (aphakia):												O	(3)			O	(3)
	i)AGE 5+ YEARS																Pseudophakia without PCO:												O	(4)			O	(4)
	Presenting																Pseudophakia with PCO:												O	(5)			O	(5)
								Right eye				Left eye					No view of lens:												O	(6)			O	(6)
	Can see 6/18								O	(1)		O	(1)				D. MAIN CAUSE OF PRESENTING VA<6/18																	Principal
	Cannot see 6/18																	(Mark only one cause for each eye)																cause in
		but can see 6/60							O	(2)		O	(2)													Right eye				Left eye				person
	Cannot see 6/60																Refractive error:											O	(1)		O	(1)		O	(1)
		but can see 3/60							O	(3)		O	(3)	CASE			Cataract, untreated											O	(2)		O	(2)		O	(2)
	Cannot see 3/60																Aphakia, uncorrected:											O	(3)		O	(3)		O	(3)
		but can see 1/60							O	(4)		O	(4)				Surgical complications:											O	(4)		O	(4)		O	(4)
	Light perception (PL+)								O	(5)		O	(5)				Trachoma:											O	(5)		O	(5)		O	(5)
	No light perception (PL-)								O	(6)		O	(6)				Phthisis/disorganised/removed:											O	(6)		O	(6)		O	(6)
																	Other corneal scar/opacity:											O	(7)		O	(7)		O	(7)
	With Pinhole																Globe abnormality:											O	(8)		O	(8)		O	(8)
								Right eye				Left eye					Cortical blindness:											O	(9)		O	(9)		O	(9)
	Can see 6/18								O	(1)		O	(1)				Dilate pupil
	Cannot see 6/18																Glaucoma:											O	(10)		O	(10)		O	(10)
		but can see 6/60							O	(2)		O	(2)				Diabetic retinopathy:											O	(11)		O	(11)		O	(11)
	Cannot see 6/60																ARMD:											O	(12)		O	(12)		O	(12)
		but can see 3/60							O	(3)		O	(3)				Onchocerciasis:											O	(13)		O	(13)		O	(13)
	Cannot see 3/60																Other post. segment / CNS:											O	(14)		O	(14)		O	(14)
		but can see 1/60							O	(4)		O	(4)				Not examined (can see 6/18)											O	(15)		O	(15)		O	(15)
	Light perception (PL+)								O	(5)		O	(5)				F. DETAILS ABOUT CATARACT OPERATION
	No light perception (PL-)								O	(6)		O	(6)															Right eye				Left eye
																	Age at operation (years)
	ii)AGE 0-2 YEARS																Place of operation
	Can the child look at and											Yes:	O	(1)				Government hospital											O	(1)			O	(1)
	follow a moving object?											No:	O	(0)				Voluntary / charitable hospital											O	(2)			O	(2)
												Unable to examine	O	(2)				Private hospital											O	(3)			O	(3)
																		Eye camp / improvised setting											O	(4)			O	(4)
	iii)AGE 3-4 YEARS																	Traditional setting											O	(5)			O	(5)
	Can child count/copy fingers											Yes:	O	(1)			Type of surgery
	from 6 meters with both											No:	O	(0)				Non IOL											O	(1)			O	(1)
	eyes open?											Unable to examine	O	(2)				IOL implant											O	(2)			O	(2)
																		Couching											O	(3)			O	(3)
																	Cost of surgery
	E. WHY CATARACT OPERATION WAS																	Totally free											O	(1)			O	(1)
		NOT DONE																Partially free											O	(2)			O	(2)
	(Mark up to 2 responses, if VA<6/18,																	Fully paid											O	(3)			O	(3)
	not improving with pinhole, witth																Cause of VA<6/18 after cataract surgery
	visually impairing lens opacity in one																	Ocular comorbidity (Selection)											O	(1)			O	(1)
	or both eyes)																	Operative complications (Surgery)											O	(2)			O	(2)
	Need not felt												O	(1)				Refractive error (Spectacles)											O	(3)			O	(3)
	Fear of surgery or poor result												O	(2)				Longterm complications (Sequelae)											O	(4)			O	(4)
	Cannot afford operation												O	(3)				Does not apply - can see 6/18											O	(5)			O	(5)
	Treatment denied by provider												O	(4)			Are you satisfied with results of cataract surgery?
	Unaware treatment is possible												O	(5)				Very satisfied											O	(1)			O	(1)
	No one to accompany												O	(6)				Partially satisfied											O	(2)			O	(2)
	No time available / other priorities												O	(7)				Indifferent											O	(3)			O	(3)
	Told to wait for cataract to mature												O	(8)				Partially dissatisfied											O	(4)			O	(4)
																10		Very dissatisfied											O	(5)			O	(5)

## Sheet: OAE and PTA Screens
E. OAE SCREEN FOR HEARING IMPAIRMENT
Cluster no:								Household no:											Subject ID no:							Examiner Code No.
1.	OAE Equipt No.
2		RIGHT EAR			Pass			Fail			Not done - discharging ear			Not done - other					LEFT EAR			Pass			Fail			Not done - discharging ear				Not done - other
						O	(1)		O	(2)		O	(3)		O	(4)							O	(1)		O	(2)		O	(3)			O	(4)
3	State reason if "not done - other":
								Pure Tone Audiometry (PTA) needed if Participant FAILS OAE in BOTH EARS or if OAE can not be done/read for any reason
							Pure Tone Audiometry Test Needed Yes O (1) No (0)
									COMPLETE FRONT PAGE BEFORE STARTING NEXT SECTION
F. PTA FOR HEARING IMPAIRMENT IF BOTH EARS FAIL OAE
II. AUDIOMETRY If aged 4+ and OAE fails in BOTH ears or can not be done
1. Ambient Noise										dBA																2.	PTA Equipment No.
2. Hearing Thresholds								Right (dBHL)						Left (dBHL)
							a.				1 KHz
							b.				2 KHz
							c.				4 KHz
							d.				0.5 KHz
							e.				1 KHz						Note: If 1KHz (e.) score not within +/- 5dbHL of 1KHz (a.) score repeat PTA screen
f. Average score a-d
Partipant SCREENS POSITIVE if Average score (f) is >35dBa for 0-17 year olds or >40dBa for 18+ in BOTH ears
							Screen case:	O	(1)			COMPLETE FRONT PAGE BEFORE STARTING NEXT SECTION
							Not Screen case:	O	(0)
																	11

## Sheet: Hearing
G. WHO/PBD Ear and Hearing Disorders Examination Form
A. GENERAL INFORMATION
Cluster no:								Household no:													Subject ID no:							Examiner Code No.
B. BASIC EAR ASSESSMENT FOR HEARING IMPAIRMENT CASES ONLY
																				IV. Ear Drum							Right								Left
							Right									Left								N		Y		N/E		U		N		Y		N/E		U
					No		Yes		Not Asked				No		Yes		Not Asked			1. Perforation				O	(0)	O	(1)	O	(2)	O	(3)	O	(0)	O	(1)	O	(2)	O	(3)
I. Ear Pain					O	(0)	O	(1)	O	(2)			O	(0)	O	(1)	O	(2)		2. Dullness or
																							Retraction	O	(0)	O	(1)	O	(2)	O	(3)	O	(0)	O	(1)	O	(2)	O	(3)
II. Auricle					N		M		N/E				N		M		N/E			3. Red and
					O	(0)	O	(1)	O	(2)			O	(0)	O	(1)	O	(2)					Bulging	O	(0)	O	(1)	O	(2)	O	(3)	O	(0)	O	(1)	O	(2)	O	(3)
				N = Normal; M= Malformation; N/E = Not Examined																4. Normal				O	(0)	O	(1)	O	(2)	O	(3)	O	(0)	O	(1)	O	(2)	O	(3)
																								N= No; Y= Yes; N/E = Not Examined; U= Unsure
III. External Canal
					N		Y		N/E				N		Y		N/E			V. Middle Ear
1. Normal					O	(0)	O	(1)	O	(2)			O	(0)	O	(1)	O	(2)						N		Y		N/E		U		N		Y		N/E		U
2. Inflammation					O	(0)	O	(1)	O	(2)			O	(0)	O	(1)	O	(2)		1. Normal				O	(0)	O	(1)	O	(2)	O	(3)	O	(0)	O	(1)	O	(2)	O	(3)
3. Wax					O	(0)	O	(1)	O	(2)			O	(0)	O	(1)	O	(2)		2. Otorrhoea				O	(0)	O	(1)	O	(2)	O	(3)	O	(0)	O	(1)	O	(2)	O	(3)
	Removed?				O	(0)	O	(1)					O	(0)	O	(1)
4. Foreign Body					O	(0)	O	(1)	O	(2)			O	(0)	O	(1)	O	(2)						N		Y		N/E		U		N		Y		N/E		U
	Removed?				O	(0)	O	(1)					O	(0)	O	(1)				VI. Others				O	(0)	O	(1)	O	(2)	O	(3)	O	(0)	O	(1)	O	(2)	O	(3)
5. Otorrhoea					O	(0)	O	(1)	O	(2)			O	(0)	O	(1)	O	(2)
	Removed?				O	(0)	O	(1)					O	(0)	O	(1)				1. If Yes, Specify						________________
6. Fungi					O	(0)	O	(1)	O	(2)			O	(0)	O	(1)	O	(2)
					N= No; Y= Yes; N/E = Not Examined
VII. Additional Information
1. How Long has the subject had difficulty hearing?																			2. Does any relative of the subject have difficulty hearing?
									Since Infancy/childhood (0-4y)	O	(1)									No			O	(0)
									Somce adulthood (15-59y)	O	(2)									Yes			O	(1)			3. If yes,			Brother or Sister						O	(1)
									Since old age (60y+)	O	(3)									Uncertain			O	(3)			specify			Child of Subject						O	(2)
									Uncertain	O	(4)									Not Asked			O	(4)						Parent of Subject						O	(3)
									No Difficulty	O	(5)
									Not Asked	O	(6)
																		12
D. CAUSE OF EAR DISEASE AND/OR HEARING IMPAIRMENT
Please tick all that apply
																		Right ear					Left ear
	Normal ear AND normal hearing											.............................							O	(1)				O	(1)
	I. Ear Disease
		1. Wax			................................................................														O	(2)				O	(2)
		2. Foreign Body					.....................................................												O	(3)				O	(3)
		3. Otitis Externa...						................................................											O	(4)				O	(4)
		4. Acute Otitis Media							...........................................										O	(5)				O	(5)
		5. Chronic Suppurative Otitis Media												....................					O	(6)				O	(6)
		6. Serous Otitis media (with effusion)													................				O	(7)				O	(7)
		7. Dry perforation of Tympanic Membrane														...........			O	(8)				O	(8)
	II. Infectious Diseases							................................................											O	(9)				O	(9)
		Specify ______________________
	III. Genetic Conditions							.................................................											O	(10)				O	(10)
		Specify ______________________
	IV. Non-Infectious Conditions										...................................								O	(11)				O	(11)
		Specify ______________________
	V. Underermined Cause								.............................................										O	(12)				O	(12)
		Specify ______________________
	VI. Other			.....................................................................															O	(13)				O	(13)
		Specify ______________________
E. ACTION NEEDED
I. No Action Needed								O	(1)
																												N			Y			U
II. Action Needed										N			Y			U							7. Others					O	(0)		O	(1)		O	(3)
	1. Medication									O	(0)		O	(1)		O	(2)							Specify_________________________________
	2. Hearing Aid									O	(0)		O	(1)		O	(2)
	3. Language/Speech									O	(0)		O	(1)		O	(2)						III. Any Additional Examiner Remarks:
		Rehabilitation																					_________________________________________
	4. Special Needs Education									O	(0)		O	(1)		O	(2)						_________________________________________
	5. Vocational Training									O	(0)		O	(1)		O	(2)						_________________________________________
	6. Surgery Referral									O	(0)		O	(1)		O	(2)						_________________________________________
		Urgent								O	(0)		O	(1)		O	(2)
		Non Urgent								O	(0)		O	(1)		O	(2)
										N= No; Y= Yes; U=Unsure
																			13
